# Supplementary material for: Cognitive-Behavioral Therapy for Medication-Resistant Psychosis: A Meta-Analytic Review
Source: Atypon-hosted journal article supplement (doi:10.1176/appi.ps.201300213), 2014-04-01
Supplement: 874_ds001.pdf [file 874_ds001.pdf]

CBT FOR MEDICATION-RESISTANT PSYCHOSIS

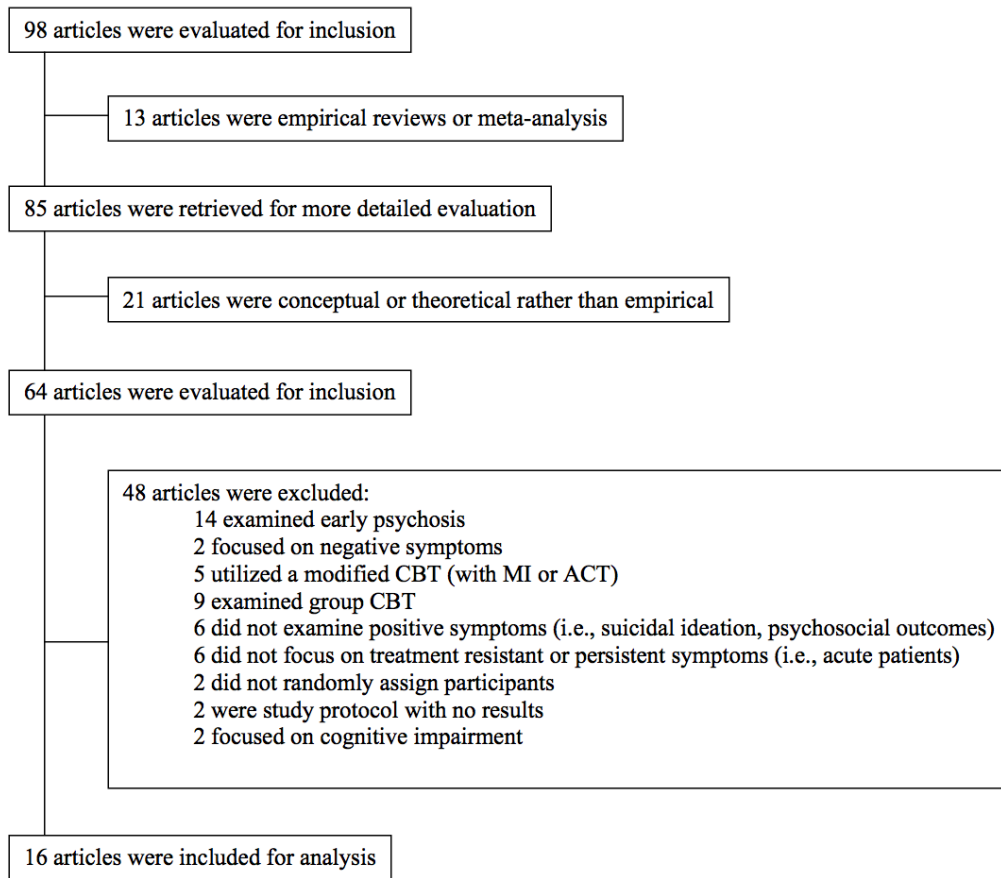

Figure 1. Quality of Reporting Meta-Analyses (QUOROM) diagram. Motivational interviewing (MI), acceptance and commitment therapy (ACT).
